# Supplementary material
Source: PubMed Central journal article supplement (PMC6864025)
Supplement: 12264_2019_384_MOESM1_ESM.pdf [file 12264_2019_384_MOESM1_ESM.pdf]

## Supplementary Materials

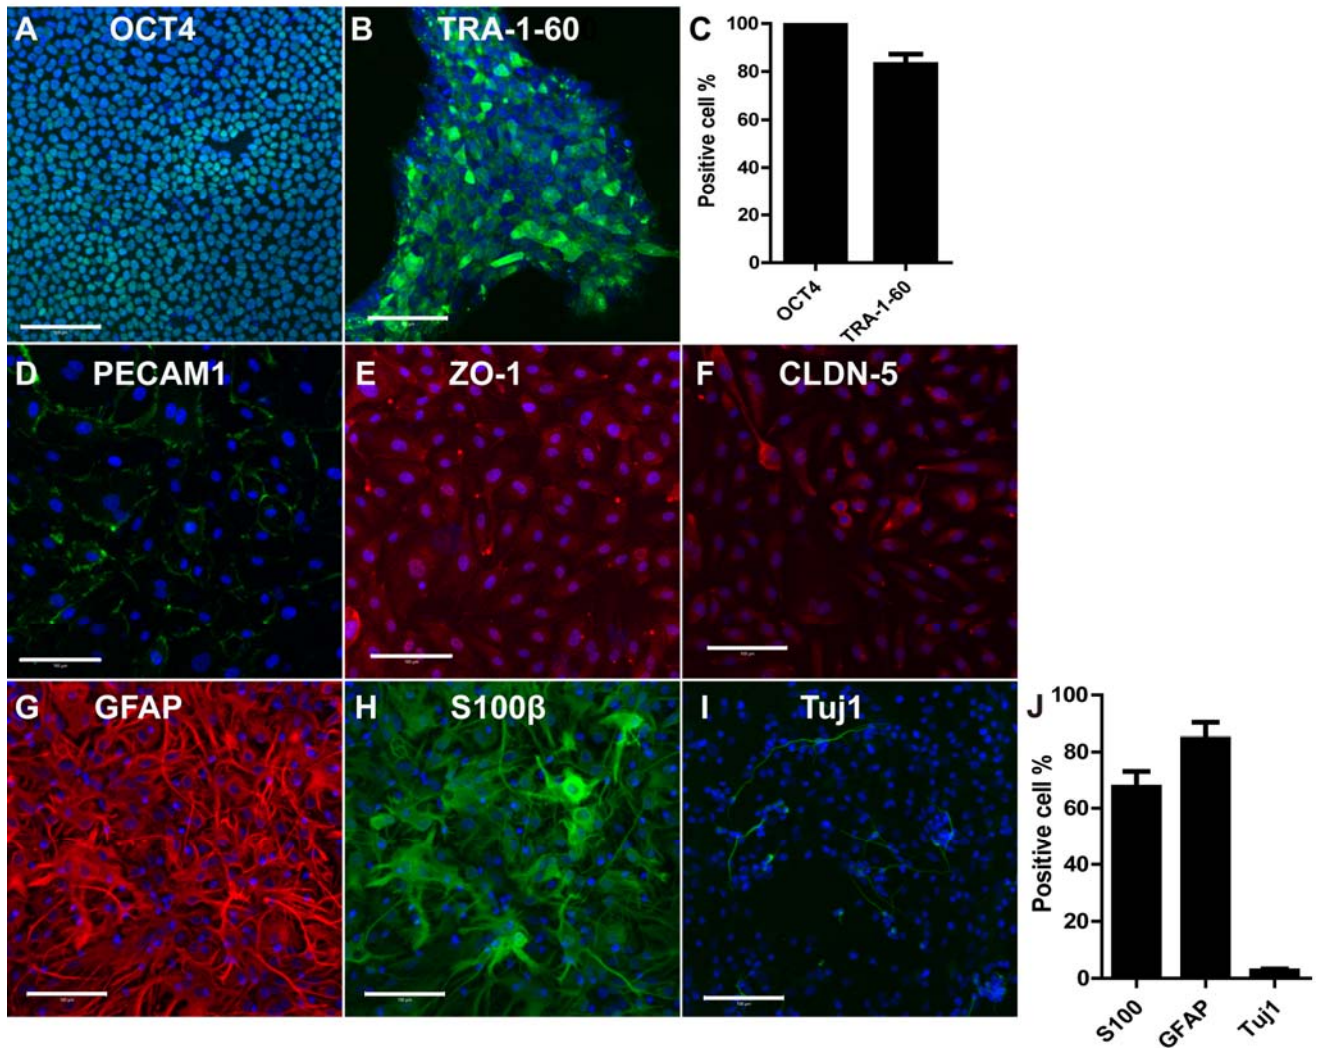

**Fig. S1 Characterization of hiPSC, HBMEC and rat primary astroglial cells.** Characterization of hiPSC line GM25256 - Panel A: OCT4 (green). B: TRA1-60 (green). C: Cellomic image analysis. Characterization of HBMEC - Panel D: PECAM1 (green). E: ZO-1 (red). F: claudin-5 (CLDN-5). Characterization of primary rat glial cells - Panel G: GFAP (red). H: S100 $\beta$  (green). I: Tuj1 (green). J: Cellomic image analysis. DAPI (blue). Scale bar is 100  $\mu$ m.

**Table S1** List of antibodies used in the study

| Target Antigen                              | Vendor             |
|---------------------------------------------|--------------------|
| ZO-1                                        | Life Technologies  |
| OCLN                                        | Life Technologies  |
| Claudin-5                                   | Abcam              |
| GLUT1 antibody                              | Abcam              |
| von Willebrand factor (VWF) antibody        | DAKO               |
| FITC-conjugated Ulex Europaeus Agglutinin I | Vector labs        |
| Transferrin Receptor                        | Abcam              |
| IGFR1 antibody                              | Cell Signaling     |
| Anti-LRP1 antibody                          | Abcam              |
| CD98hc antibody                             | Santa Cruz Biotech |
| Pgp                                         | Sigma-Aldrich      |
| BCRP                                        | Millipore          |
| Multidrug resistance protein 1 (MRP1)       | Millipore          |
| Oct3/4                                      | Santa Cruz Biotech |
| TRA1-60                                     | Millipore          |
| GFAP                                        | DAKO               |
| S100 $\beta$                                | Abcam              |
| Tuj1                                        | Millipore          |
